# Supplementary material for: Computational annotation of genes differentially expressed along olive fruit development
Source: Springer Nature journal article supplement (doi:10.1186/1471-2229-9-128), 2009-10-24
Supplement: Additional file 7 [file 1471-2229-9-128-s7.pdf]

| <b>Enzyme Id</b>  | <b>Enzyme</b>                                               |
|-------------------|-------------------------------------------------------------|
| ec:1.1.1.1_A      | alcohol dehydrogenase                                       |
| ec:1.1.1.100_B    | 3-oxoacyl-[acyl-carrier-protein] reductase                  |
| ec:1.1.1.219_A    | dihydrokaempferol 4-reductase                               |
| ec:1.1.1.219_D    | dihydrokaempferol 4-reductase                               |
| ec:1.1.1.37_C     | malate dehydrogenase                                        |
| ec:1.1.1.37_D     | malate dehydrogenase                                        |
| ec:1.1.1.40_B     | malate dehydrogenase (oxaloacetate-decarboxylating) (NADP+) |
| ec:1.1.1.40_C     | malate dehydrogenase (oxaloacetate-decarboxylating) (NADP+) |
| ec:1.11.1.7_A_1   | peroxidase                                                  |
| ec:1.11.1.7_A_2   | peroxidase                                                  |
| ec:1.13.11.12_A   | lipoxygenase                                                |
| ec:1.13.11.12_B   | lipoxygenase                                                |
| ec:1.13.11.12_D   | lipoxygenase                                                |
| ec:1.14.11.19_D_1 | leucocyanidin oxygenase                                     |
| ec:1.14.11.19_D_2 | leucocyanidin oxygenase                                     |
| ec:1.14.11.9_D    | flavanone 3-dioxygenase                                     |
| ec:1.14.19.2_D_1  | acyl-[acyl-carrier-protein] desaturase                      |
| ec:1.14.19.2_D_2  | acyl-[acyl-carrier-protein] desaturase                      |
| ec:1.15.1.1_D     | superoxide dismutase                                        |
| ec:1.2.1.12_B     | glyceraldehyde-3-phosphate dehydrogenase (phosphorylating)  |
| ec:1.2.1.12_B/D   | glyceraldehyde-3-phosphate dehydrogenase (phosphorylating)  |
| ec:1.2.1.12_C     | glyceraldehyde-3-phosphate dehydrogenase (phosphorylating)  |
| ec:1.3.1.9_C      | enoyl-[acyl-carrier-protein] reductase (NADH)               |
| ec:1.6.5.3_D      | NADH dehydrogenase (ubiquinone)                             |
| ec:1.6.5.4_D      | monodehydroascorbate reductase (NADH)                       |
| ec:2.2.1.7_A      | 1-deoxy-D-xylulose-5-phosphate synthase                     |
| ec:2.3.1.39_D     | [acyl-carrier-protein] S-malonyltransferase                 |
| ec:2.3.1.74_D_1   | naringenin-chalcone synthase                                |
| ec:2.3.1.74_D_2   | naringenin-chalcone synthase                                |
| ec:2.3.3.8_A_1    | ATP citrate synthase / citrate (Si)-synthase                |
| ec:2.3.3.8_A_2    | ATP citrate synthase / citrate (Si)-synthase                |
| ec:2.4.1.12_A     | cellulose synthase (UDP-forming)                            |
| ec:2.4.1.12_B     | cellulose synthase (UDP-forming)                            |
| ec:2.4.1.241_C    | digalactosyldiacylglycerol synthase                         |
| ec:2.5.1.18_D     | glutathione transferase                                     |
| ec:2.5.1.6_A_1    | methionine adenosyltransferase                              |
| ec:2.5.1.6_A_2    | methionine adenosyltransferase                              |
| ec:2.7.1.11_D     | 6-phosphofructokinase                                       |
| ec:2.7.1.20_B     | adenosine kinase                                            |
| ec:2.7.1.33_B     | pantothenate kinase                                         |
| ec:2.7.1.40_B_1   | pyruvate kinase                                             |
| ec:2.7.1.40_B_2   | pyruvate kinase                                             |
| ec:2.7.1.40_B_3   | pyruvate kinase                                             |
| ec:2.7.1.40_C     | pyruvate kinase                                             |
| ec:2.7.11.25_C    | mitogen-activated protein kinase                            |

| <b>Enzyme Id</b> | <b>Enzyme</b>                                  |
|------------------|------------------------------------------------|
| ec:2.7.7.27_A    | glucose-1-phosphate adenyltransferase          |
| ec:2.8.1.2_B     | 3-mercaptopyruvate sulfurtransferase           |
| ec:3.1.1.11_D    | pectinesterase                                 |
| ec:3.1.1.4_A     | phospholipase A2                               |
| ec:3.1.1.4_D     | phospholipase A2                               |
| ec:3.1.2.14_A    | oleoyl-[acyl-carrier-protein] hydrolase        |
| ec:3.1.3.16_D    | phosphoprotein phosphatase                     |
| ec:3.1.4.4_A     | phospholipase D                                |
| ec:3.1.4.4_B     | phospholipase D                                |
| ec:3.2.1.0_B     | alpha-amylase, galactinol                      |
| ec:3.2.1.125_C   | raucafficine beta-glucosidase                  |
| ec:3.2.1.15_B    | polygalacturonase                              |
| ec:3.2.1.2_A/B   | beta-amylase                                   |
| ec:3.2.1.21_B    | beta-glucosidase                               |
| ec:3.2.1.23_D    | beta-galactosidase                             |
| ec:3.5.1.1_D     | asparaginase                                   |
| ec:3.5.1.4_C     | amidase                                        |
| ec:3.6.3.14_A    | H <sup>+</sup> -transporting two-sector ATPase |
| ec:4.1.1.19_D    | arginine decarboxylase                         |
| ec:4.1.1.28_A_1  | aromatic-L-amino-acid decarboxylase            |
| ec:4.1.1.28_A_2  | aromatic-L-amino-acid decarboxylase            |
| ec:4.1.1.28_A_3  | aromatic-L-amino-acid decarboxylase            |
| ec:4.1.1.49_D    | phosphoenolpyruvate carboxykinase (ATP)        |
| ec:4.1.1.50_C    | adenosylmethionine decarboxylase               |
| ec:4.2.1.11_B_1  | phosphopyruvate hydratase                      |
| ec:4.2.1.11_B_2  | phosphopyruvate hydratase                      |
| ec:4.2.1.11_B_3  | phosphopyruvate hydratase                      |
| ec:4.2.1.11_C    | phosphopyruvate hydratase                      |
| ec:4.2.2.2_A_1   | pectate lyase                                  |
| ec:4.2.2.2_A_2   | pectate lyase                                  |
| ec:4.2.2.2_A_3   | pectate lyase                                  |
| ec:5.1.3.18_B    | GDP-mannose 3,5-epimerase                      |
| ec:5.3.1.5_D     | xylose isomerase                               |
| ec:5.3.3.8_D     | dodecenoyl-CoA isomerase                       |
| ec:6.3.2.19_D    | ubiquitin protein ligase                       |
| ec:6.4.1.2_B_1   | acetyl-CoA carboxylase                         |
| ec:6.4.1.2_B_2   | acetyl-CoA carboxylase                         |
| ec:6.4.1.2_C     | acetyl-CoA carboxylase                         |
| hormon_1         | senescence-associated protein                  |
| hormon_2         | aldo/keto reductase family protein             |
| hormon_3         | pyridoxine biosynthesis                        |
| hormon_4         | UDP-glycosyltransferase                        |
| hormon_5         | arabidopsis response regulator 1               |
| hormon_6         | ABA deficient 2                                |
